# Supplementary material for: Validity assessment of self-reported medication use by comparing to pharmacy insurance claims
Source: HighWire-hosted journal article supplement (doi:10.1136/bmjopen-2015-009490), 2015-11-01
Supplement: bmjopen-2015-009490supp2.pdf [file bmjopen-2015-009490supp2.pdf]

Supplementary File 2. Drugs for diabetes

| Therapeutic category of drugs in          |               | Generic names                               | ATC codes                |                                                  |         |         |         |  |
|-------------------------------------------|---------------|---------------------------------------------|--------------------------|--------------------------------------------------|---------|---------|---------|--|
|                                           | Japan         |                                             |                          |                                                  |         |         |         |  |
| 24: Hormones                              | 249:          | exenatide                                   | -                        |                                                  |         |         |         |  |
|                                           | Miscellaneous | insulin aspart (genetical recombination)    | A10AB05                  | A10AD05                                          |         |         |         |  |
|                                           |               | insulin degludec (genetical recombination)  | A10AE06                  |                                                  |         |         |         |  |
|                                           |               | insulin detemir (genetical recombination)   | A10AE05                  |                                                  |         |         |         |  |
|                                           |               | insulin glargine (genetical recombination)  | A10AE04                  |                                                  |         |         |         |  |
|                                           |               | insulin glulisine (genetical recombination) | A10AB06                  |                                                  |         |         |         |  |
|                                           |               | insulin human (genetical recombination)     | A10AB01                  | A10AC01                                          | A10AD01 | A10AE01 | A10AF01 |  |
|                                           |               | insulin lispro (genetical recombination)    | A10AB04                  | A10AC04                                          | A10AD04 |         |         |  |
|                                           |               | liraglutide (genetical recombination)       | A10BX07                  |                                                  |         |         |         |  |
|                                           |               | lixisenatide                                | A10BX10                  |                                                  |         |         |         |  |
|                                           |               | mecasermin (genetical recombination)        | H01AC03                  |                                                  |         |         |         |  |
|                                           |               | 39: Other agents affecting metabolism       | 396: Antidiabetic agents | acarbose                                         | A10BF01 |         |         |  |
|                                           |               |                                             |                          | acetohexamide                                    | A10BB31 |         |         |  |
|                                           |               |                                             |                          | alogliptin benzoate                              | A10BH04 |         |         |  |
|                                           |               |                                             |                          | alogliptin benzoate · pioglitazone hydrochloride | A10BD09 |         |         |  |
|                                           |               |                                             |                          | anagliptin                                       | -       |         |         |  |
| buformin hydrochloride                    | A10BA03       |                                             |                          |                                                  |         |         |         |  |
| canagliflozin hydrate                     | A10BX11       |                                             |                          |                                                  |         |         |         |  |
| chlorpropamide                            | A10BB02       |                                             |                          |                                                  |         |         |         |  |
| dapagliflozin propylene glycolate hydrate | A10BX09       |                                             |                          |                                                  |         |         |         |  |
| glibenclamide                             | A10BB01       |                                             |                          | A10BB01                                          |         |         |         |  |
| gliclazide                                | A10BB09       |                                             |                          | A10BB09                                          |         |         |         |  |
| glimepiride                               | A10BB12       |                                             |                          |                                                  |         |         |         |  |
| glycopyramide                             | -             |                                             |                          |                                                  |         |         |         |  |
| ipragliflozin L-proline                   | -             |                                             |                          |                                                  |         |         |         |  |
| linagliptin                               | A10BH05       |                                             |                          |                                                  |         |         |         |  |
| luseogliflozin hydrate                    | -             |                                             |                          |                                                  |         |         |         |  |
| metformin hydrochloride                   | A10BA02       |                                             |                          |                                                  |         |         |         |  |
| miglitol                                  | A10BF02       |                                             |                          |                                                  |         |         |         |  |
| mitiglinide calcium hydrate               | A10BX08       |                                             |                          |                                                  |         |         |         |  |
| mitiglinide calcium hydrate · voglibose   | -             |                                             |                          |                                                  |         |         |         |  |
| nateglinide                               | A10BX03       |                                             |                          |                                                  |         |         |         |  |
| pioglitazone hydrochloride                | A10BG03       |                                             |                          |                                                  |         |         |         |  |

---

|                                                         |         |
|---------------------------------------------------------|---------|
| pioglitazone hydrochloride · glimepiride                | A10BD06 |
| pioglitazone hydrochloride · metformin<br>hydrochloride | A10BD05 |
| repaglinide                                             | A10BX02 |
| saxagliptin hydrate                                     | A10BH03 |
| sitagliptin phosphate hydrate                           | A10BH01 |
| teneligliptin hydrobromide hydrate                      | -       |
| tofogliflozin hydrate                                   | -       |
| tolbutamide                                             | A10BB03 |
| vildagliptin                                            | A10BH02 |
| voglibose                                               | A10BF03 |

---
